# Supplementary material
Source: PubMed Central journal article supplement (PMC1783830)
Supplement: JCI0729528sd.pdf [file JCI0729528sd.pdf]

**Figure S2.** Le Bacquer et al. 2006

**a.**

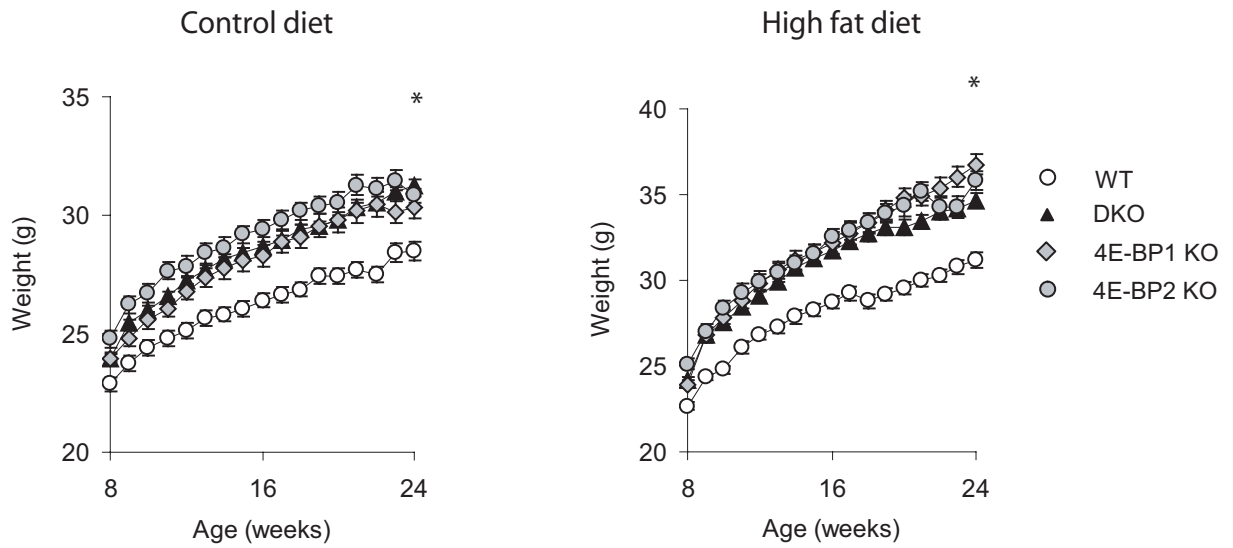

**b.**

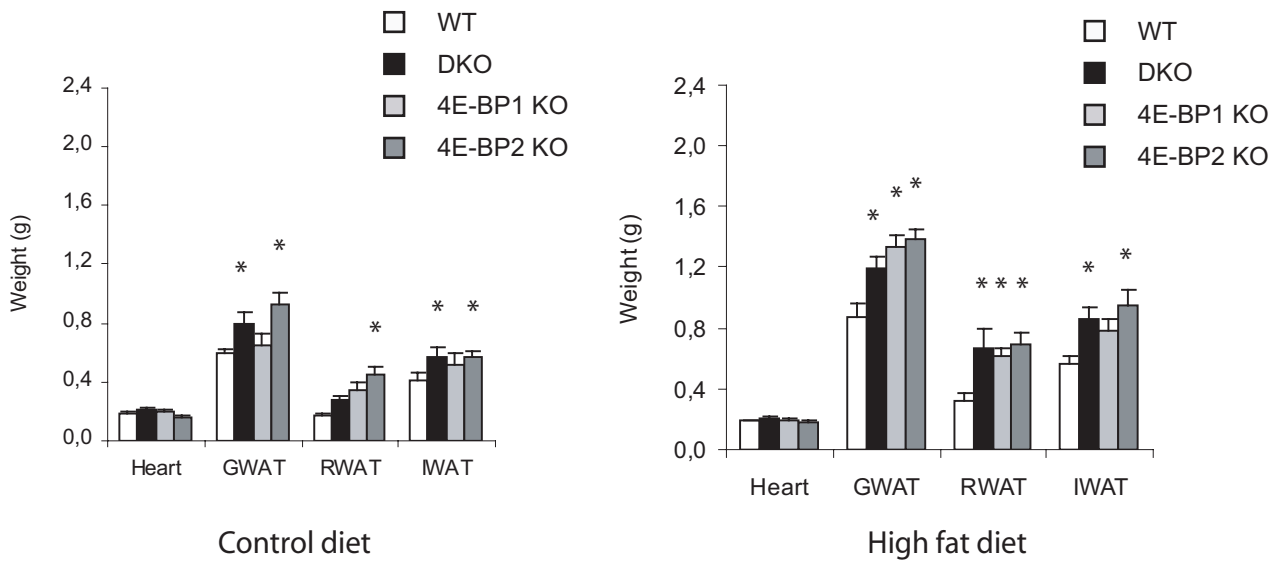

Figure S3. Le Bacquer et al. 2006

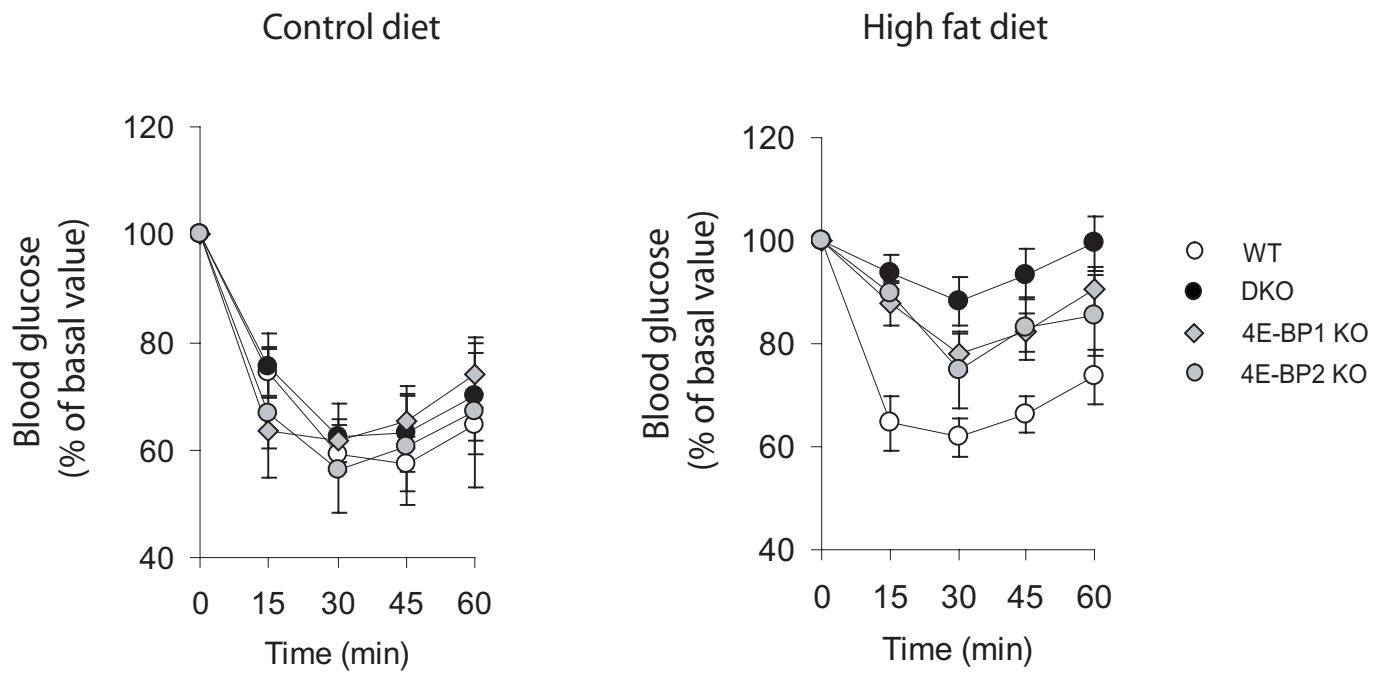

Figure S4. Le Bacquer et al. 2006

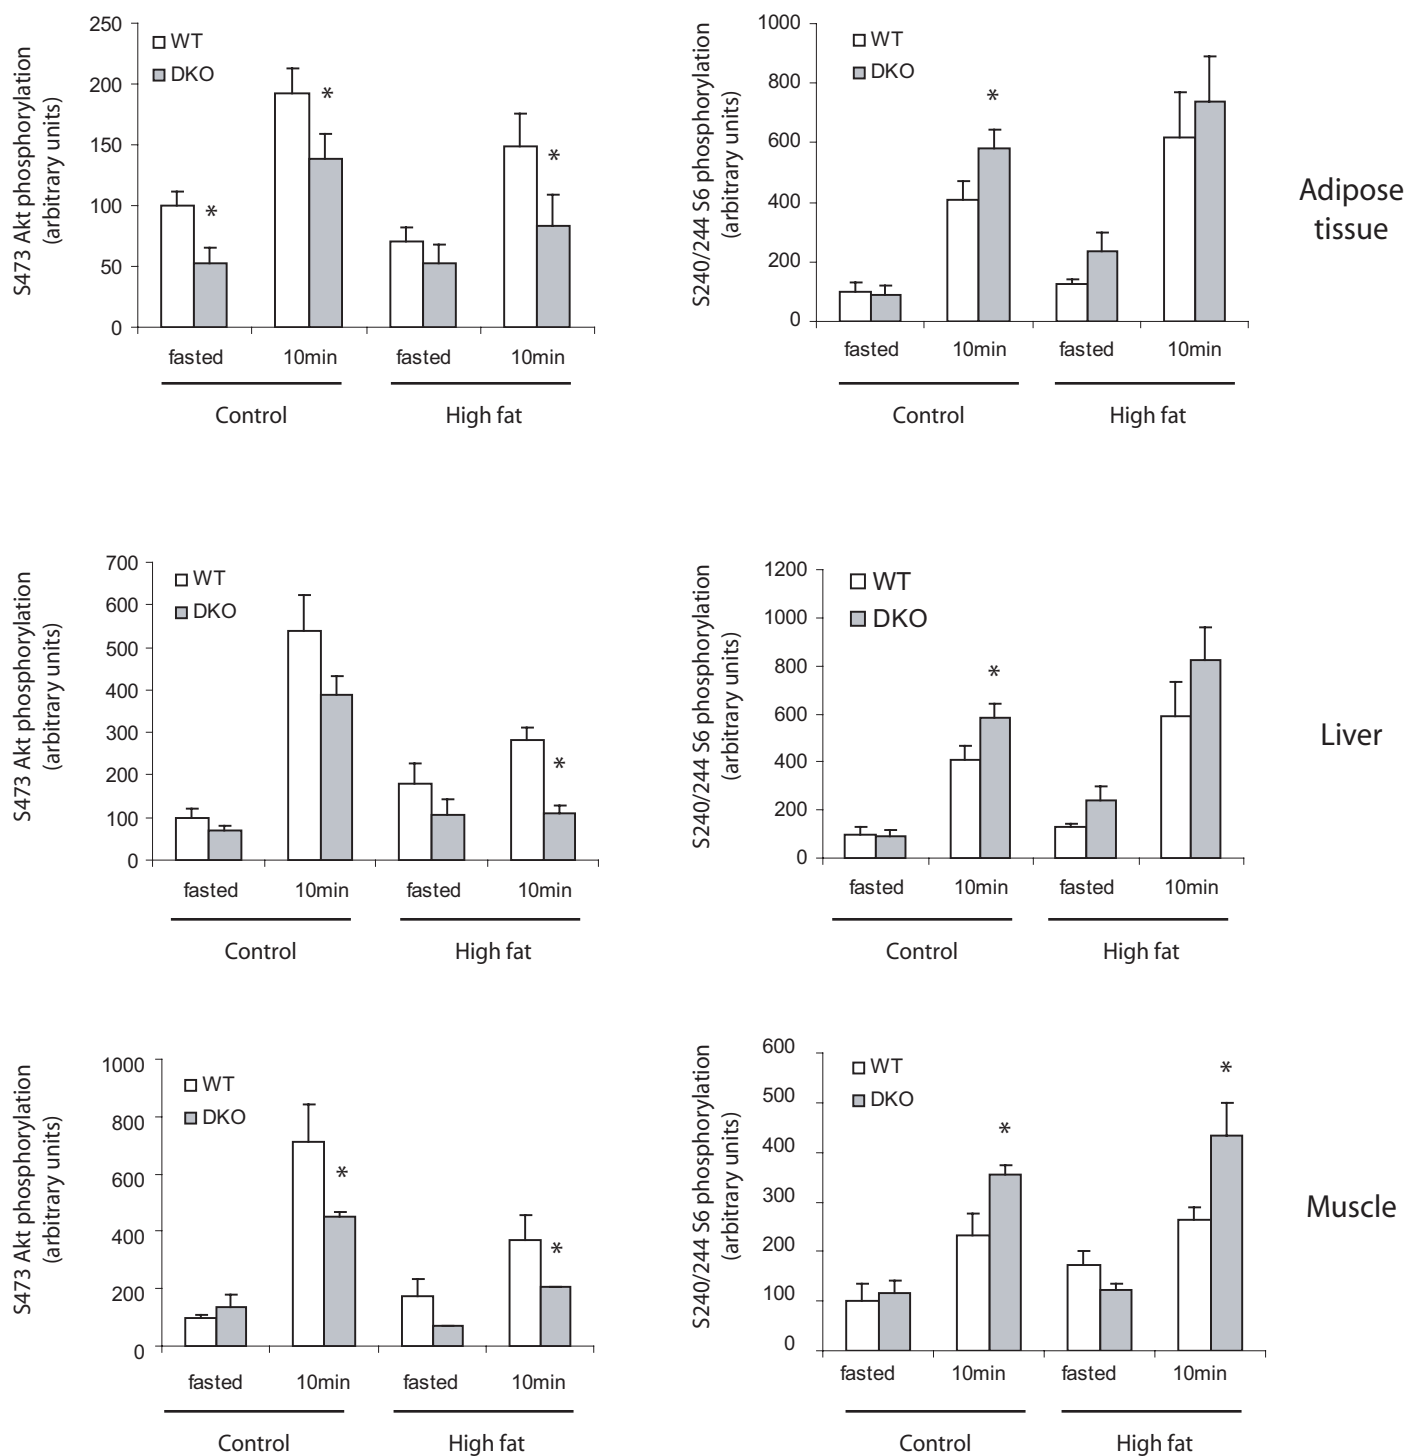

**Figure S5.** Le Bacquer et al. 2006

**a.**

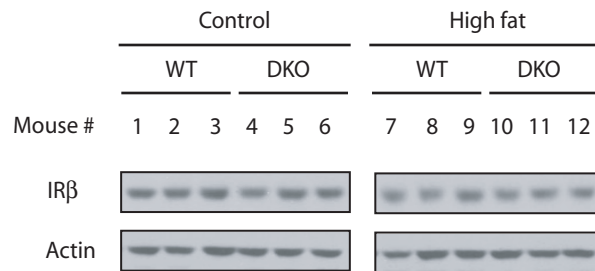

**b.**

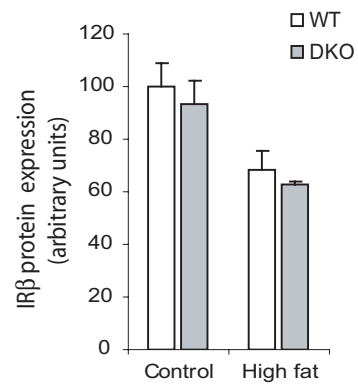

**Figure S6.** Le Bacquer et al. 2006

**a.**

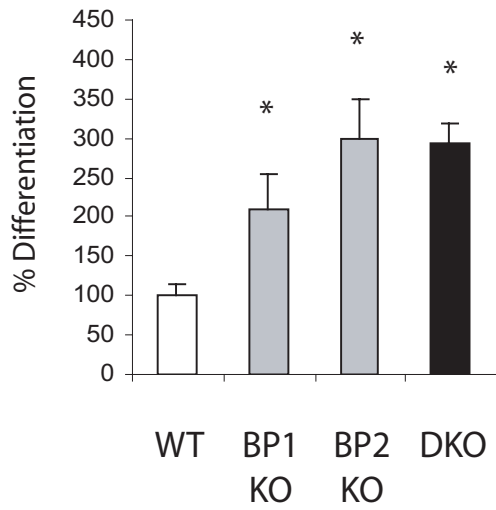

**b.**

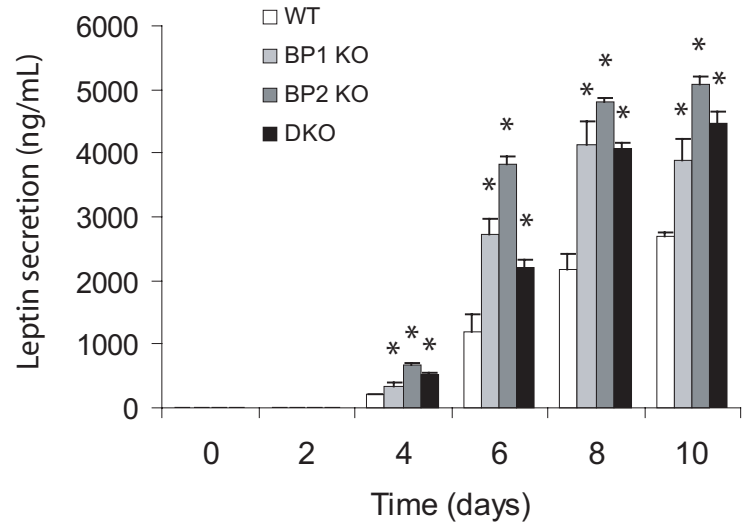

**c.**

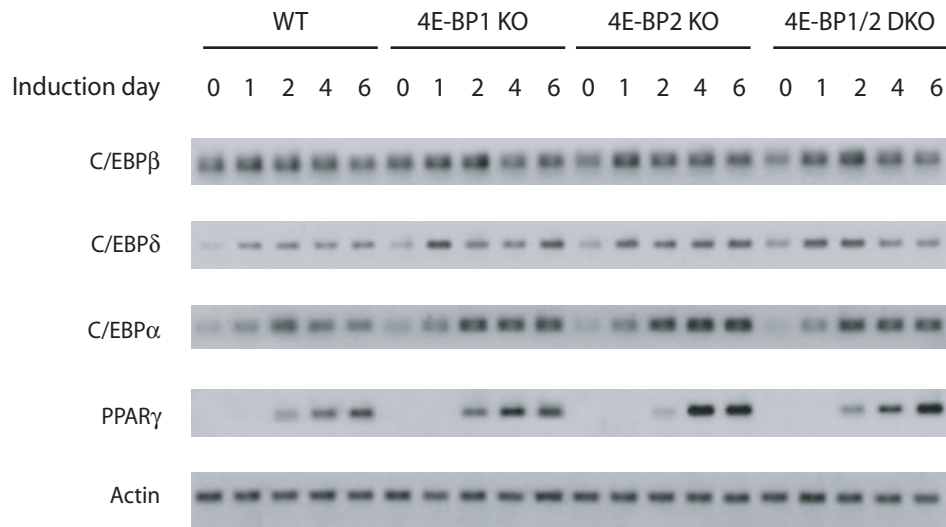

**d.**

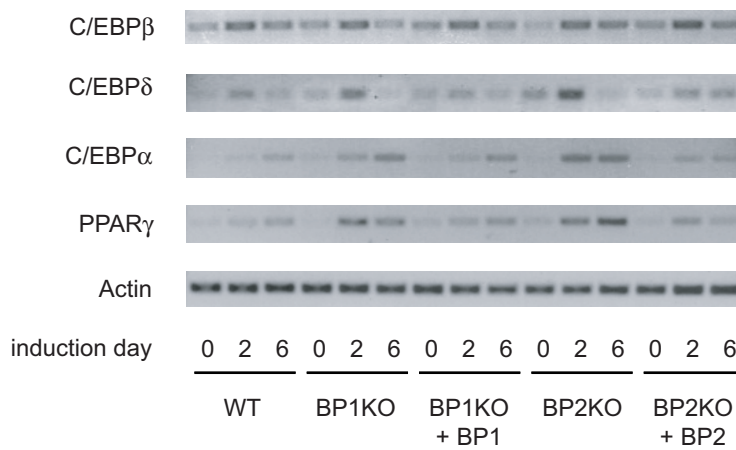

## SUPPLEMENTAL RESULTS

**Characterization of 4E-BP1 KO and 4E-BP2 KO mice.** In a mixed genetic background (Balb/c + 129SvJ1), 4E-BP1 mutant mice are leaner than WT littermates (10). To determine whether the greater sensitivity to high fat diet-induced obesity exhibited by the DKO arose from the 4E-BP2 deletion, we fed 4E-BP1 KO and 4E-BP2 KO mice a control or high fat diet. Deletion of either 4E-BP1 or 4E-BP2 resulted in increased body weight as compared to WT; in addition, we **found no** significant difference in body weight between 4E-BP1 KO and 4E-BP2 KO mice on the control diet (Fig. S2). The difference in the body weight phenotype of Balb/c inbred *Eif4ebp1* and *Eif4ebp2* knockout mice and those in a mixed genetic background (10) is addressed in the Discussion. Blood parameters of 4E-BP1 KO, 4E-BP2 KO and WT mice were somewhat similar on the control diet; however, the HDL level was significantly increased in 4E-BP1 KO and 4E-BP2 KO mice, and cholesterol was significantly increased only in the 4E-BP2 KO as compared to WT (Table S1).

The high fat diet caused a greater increase in body weight gain in both the 4E-BP1 KO and 4E-BP2 KO mice (+24% and +23% respectively,  $P < 0.01$ ) as compared to WT mice. The high fat diet also resulted in increased insulin and HDL-cholesterol levels in 4E-BP1 KO and 4E-BP2 KO mice as compared to WT and led to increased cholesterol in 4E-BP2 KO mice (Table S1). Leptin levels were similar in 4E-BP single KO and WT mice, whereas they were significantly increased in DKO mice (Tables 1, S1). Despite high fat diet-associated adipose tissue enlargement and blood parameter perturbations observed in 4E-BP1 KO and 4E-BP2 KO mice (Table S1 and Fig. S2), the insulin

resistance was less pronounced in the 4E-BP single KOs as compared to DKO mice (Fig. S3). These data show that 4E-BP1 and 4E-BP2 may have a synergetic effect on the development of high fat diet-induced obesity and on the control of insulin sensitivity.

## SUPPLEMENTAL FIGURE LEGENDS

**Figure S1.** Disruption of 4E-BP1 and 4E-BP2 genes. **(a)** Schematic representation of mouse 4E-BP1 and 4E-BP2 gene targeting with the positions of the corresponding primers used for PCR-genotyping and sizes of the RT-PCR products indicated. **(b)** RT-PCR analysis of the wild-type (+/+), heterozygous (+/-) and knockout (-/-) 4E-BP1 and 4E-BP2 genotypes. For 4E-BP1 knockout genotyping, primers were as follows: The exon-2 sense primer (5'-GATGGAGTGTCGGAACCTCACC-3'), the Neo-specific sense primer (5'-GCATCGAGCGAGCACGTAAGTCTC-3), and the intron 2-specific antisense primer (5'-GACCTGGACAGGACTCACCAGC-3') were included in each RT-PCR reaction. For 4E-BP2 knockout genotyping, primers were as follows: The intron 2-specific sense primer (5'-GGTGGGACTGTCGGTCTTCTG-3'), the Neo-specific sense primer (5'-GCATCGAGCGAGCACGTAAGTCTC-3), and the intron 2-specific antisense primer (5'-CAGCACCTGGTCATAGCCGTG-3'). **(c)** Western blot analysis of 4E-BP1 and 4E-BP2 in wild-type (WT), 4E-BP1 KO, 4E-BP2 KO and DKO liver and brain tissue.

**Figure S2.** Increased obesity and insulin resistance in 4E-BP1 KO and 4E-BP2 KO mice. **(a)** Growth curve of WT, 4E-BP1 KO, 4E-BP2 KO, and DKO mice under normal chow



diet (control) or high fat diet. **(b)** Weight of heart, gonadal (GWAT), retroperitoneal (RWAT), and inguinal (IWAT) white adipose tissues. Values are means  $\pm$  s.e.m. \*,  $p < 0.05$ .

**Figure S3.** Insulin resistance test in 24-week old WT, 4E-BP1 KO, 4E-BP2 KO, and 4E-BP1/2 DKO mice on control and high fat diets. Fed mice received an intraperitoneal injection of 0.75U/kg insulin. Insulin and blood samples were taken at the indicated times (n= 6-8) Values are means  $\pm$  s.e.m. \*,  $p < 0.05$

**Figure S4.** Ser473 Akt and ser240/244 S6 protein phosphorylation in WT and 4E-BP1/2 DKO mouse adipose, liver, and muscle tissues on control and high fat diets. Mice were fasted for 6h before receiving a 0.75U/kg insulin injection in the tail vein. Ten minutes later, the animals were sacrificed and tissues were collected for western blotting. Analysis was performed on 4 different experiments with ImageJ software (NIH).

**Figure S5.** Insulin receptor beta (IR $\beta$ ) expression in WT and DKO adipose tissue. **(a)** Western blot analysis of IR $\beta$ . **(b)** Quantification of IR $\beta$  protein levels in WT and DKO adipose tissue. Levels were normalized to actin (n=6-7). Data are means  $\pm$  s.e.m. Statistical analysis was performed with a two-tailed, unpaired, Student's *t*-test. \*,  $p < 0.05$  compared with WT.

**Figure S6.** Increased adipogenesis in 4E-BP1 KO and 4E-BP2 KO MEFs. Primary MEFs from WT, 4E-BP1 KO and 4E-BP2 KO mice were grown to confluence and

differentiated into adipocytes as described in the Materials. **(a)** Quantification of lipid incorporation by measuring the intensity of Oil red O staining in WT, 4E-BP1 KO and 4E-BP2 KO MEFs at day 10 of the adipocyte differentiation process. **(b)** Quantification of leptin secretion. Secretion of leptin into the culture medium was measured throughout the adipogenesis induction period. **(c)** RT-PCR analysis showing C/EBP $\beta$ , C/EBP $\delta$ , C/EBP $\alpha$  and PPAR $\gamma$  expression following differentiation of WT, 4E-BP1 KO, and 4E-BP2 KO MEFs is shown. **(d)** RT-PCR analysis showing C/EBP $\beta$ , C/EBP $\delta$ , C/EBP $\alpha$  and PPAR $\gamma$  expression following differentiation of WT, single 4E-BP1 and 4E-BP2 KO MEFs and 4E-BP KO MEFs in which the corresponding missing 4E-BP was reintroduced is shown.

**Table S1.** Body weight and fasted insulin, glucose, cholesterol, triglycerides, and leptin levels of 4E-BP1 KO and 4E-BP2 KO mice on control and high fat diets.

|                    | WT        |           | 4E-BP1/2 DKO |            | 4E-BP1 KO  |            | 4E-BP2 KO  |            |
|--------------------|-----------|-----------|--------------|------------|------------|------------|------------|------------|
|                    | Control   | High fat  | Control      | High fat   | Control    | High fat   | Control    | High fat   |
| Weight (g)         | 28.5±0.4  | 31.2±0.6  | 31.3±0.2*    | 34.7±0.4*  | 30.3±0.5*  | 36.8±0.6*  | 30.8±0.3*  | 35.8±0.6*  |
| Weight gain (g)    | 5.6±0.2   | 8.8±0.4   | 7.2±0.2*     | 10.8±0.4*  | 7.1±0.3*   | 9.8±0.5    | 6.1±0.4    | 8.4±0.4    |
| Glucose (mg/dl)    | 87±8      | 146±7     | 72±5         | 180±10*    | 76±10      | 156±11     | 82±19      | 169±19     |
| Insulin (mg/l)     | 1.92±0.29 | 2.36±0.49 | 2.51±0.30    | 4.40±0.71* | 1.76±0.46  | 4.57±0.67* | 1.50±0.20  | 3.57±0.27* |
| Cholesterol (mM)   | 4.20±0.17 | 4.69±0.19 | 5.02±0.22*   | 5.54±0.17* | 4.36±0.22  | 5.12±0.14  | 4.87±0.17* | 5.43±0.21* |
| HDL-Chol. (mM)     | 3.23±0.18 | 3.71±0.17 | 3.87±0.23    | 4.36±0.21* | 3.69±0.21* | 4.32±0.19* | 4.43±0.13* | 4.80±0.29* |
| NEFA (mM)          | 1.84±0.12 | 1.32±0.08 | 1.92±0.14    | 1.61±0.13  | 1.50±0.04  | 1.32±0.06  | 1.67±0.10  | 1.29±0.07  |
| Triglycerides (mM) | 2.05±0.16 | 1.20±0.06 | 2.12±0.12    | 1.44±0.10  | 1.46±0.09  | 1.20±0.06  | 1.85±0.09  | 1.40±0.04  |
| Leptin (ng/ml)     | 12.6±1.4  | 21.3±3.8  | 16.1±2.0     | 37.4±4.8*  | ND         | 31.3±2.5   | ND         | 30.8±3.4   |

Mice were 24 weeks old. Data are presented as mean ± s.e.m. Statistical Analysis was performed with a two-tailed, unpaired, Student's *t*-test. \*, *p* < 0.05 compared with wild-type (n = 10-15).
